# Supplementary material for: Land management strategies can increase oil palm plantation use by some terrestrial mammals in Colombia
Source: PubMed Central journal article supplement (PMC6534675; doi:10.1038/s41598-019-44288-y), 2019-05-24
Supplement: 41598_2019_44288_MOESM1_ESM.pdf [file 41598_2019_44288_MOESM1_ESM.pdf]

## Supplementary information

### **Land management strategies can increase oil palm plantation use by some terrestrial mammals in Colombia**

**Lain E. Pardo<sup>1,2\*</sup>, Mason J. Campbell<sup>2</sup>, Michael V. Cove<sup>3</sup>, Will Edwards<sup>2</sup>, Gopalasamy Reuben Clements<sup>4,5</sup> and William F. Laurance<sup>2</sup>**

\*lepardov@gmail.com

<sup>1</sup> School of Natural Resource Management, Nelson Mandela University, George Campus, Madiba Drive 6560, South Africa

<sup>2</sup> Centre for Tropical Environmental and Sustainability Science (TESS), College of Science and Engineering, James Cook University, Cairns, Queensland, 4878 Australia.

<sup>3</sup> Department of Applied Ecology, North Carolina State University, Raleigh, North Carolina, 27695, USA

<sup>4</sup> Department of Biological Sciences, Sunway University, 47500 Bandar Sunway, Selangor, Malaysia

<sup>5</sup> Rimba, Jalan Kiara 5, 50480 Kuala Lumpur, Malaysia

**Fig S1.** Detection probability( $p$ ) for most common species across oil palm dominated landscapes in Colombian Llanos. Error bars indicate confidence intervals.

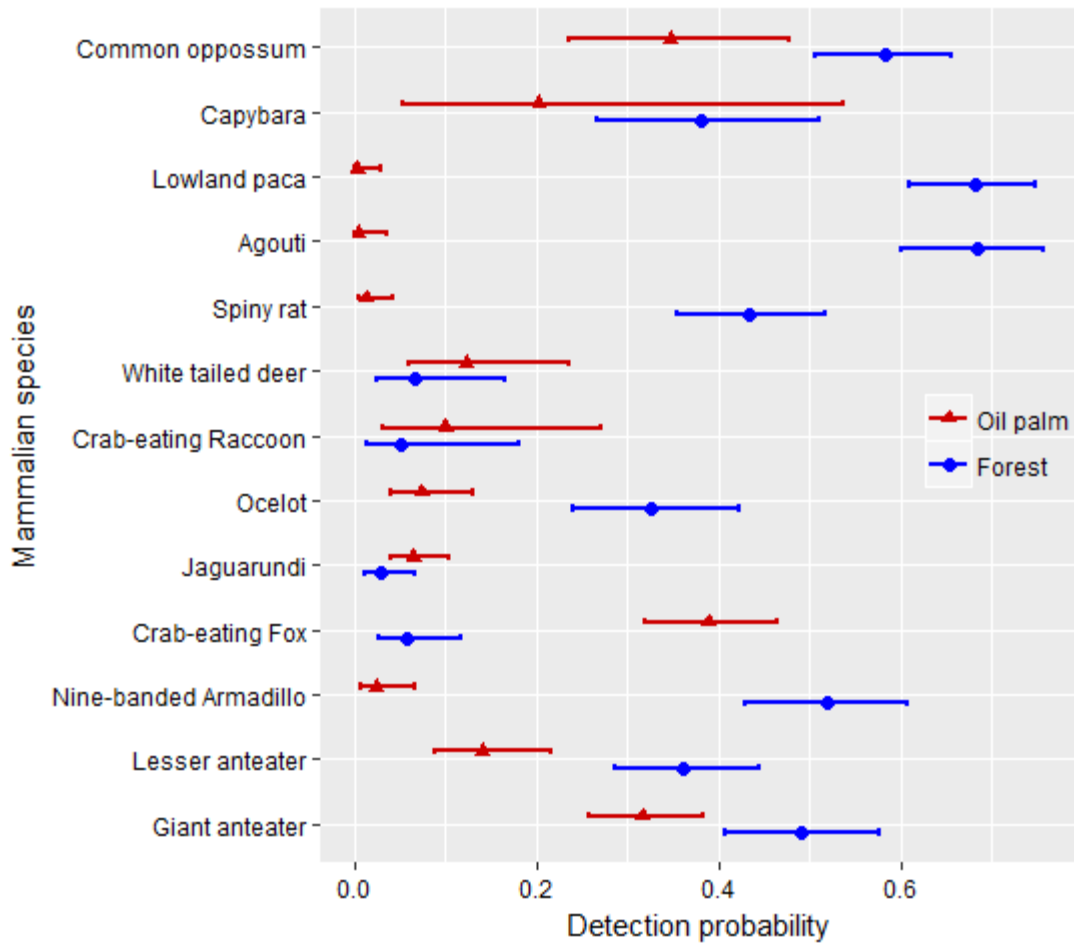

**Table S1.** Model selection ( $\Delta AICc < 2$ ) evaluating the effect of habitat type (hab) on habitat use probabilities ( $\Psi$ ) and detection probabilities (p) for selected mammal species\*. Habitat type is a binary variable where 0=forest (intercept) and 1= oil palm plantation ( $\beta$ ), a negative value of the corresponding  $\beta$  coefficient suggest preference for forest and vice versa.

| <b>Model</b>                      | <b>AIC</b> | <b><math>\Delta AICc</math></b> | <b>AIC <math>w</math></b> | <b><math>k</math></b> | <b><math>\beta</math> (SE)<br/>Oil palm</b> |
|-----------------------------------|------------|---------------------------------|---------------------------|-----------------------|---------------------------------------------|
| <b>Giant anteater</b>             |            |                                 |                           |                       |                                             |
| $\Psi(\cdot), p(\text{hab})$      | 526.26     | 0                               | 0.501                     | 3                     |                                             |
| $\Psi(\text{hab}), p(\text{hab})$ | 526.32     | 0.06                            | 0.4862                    | 4                     | 2.12 (2.60)                                 |
| <b>Lesser anteater</b>            |            |                                 |                           |                       |                                             |
| $\Psi(\text{hab}), p(\text{hab})$ | 391.21     | 0                               | 0.4979                    | 4                     | -1.64 (0.97)                                |
| $\Psi(\cdot), p(\text{hab})$      | 391.32     | 0.11                            | 0.4713                    | 3                     |                                             |
| <b>Nine-banded armadillo</b>      |            |                                 |                           |                       |                                             |
| $\Psi(\cdot), p(\text{hab})$      | 242.34     | 0                               | 0.6103                    | 3                     |                                             |
| $\Psi(\text{hab}), p(\text{hab})$ | 243.25     | 0.91                            | 0.3872                    | 4                     | -2.31 (1.15)                                |
| <b>Naked-tailed armadillo</b>     |            |                                 |                           |                       |                                             |
| $\Psi(\text{hab}), p(\cdot)$      | 110.55     | 0                               | 0.7612                    | 3                     | -26.48 (#)                                  |
| <b>Crab-eating fox</b>            |            |                                 |                           |                       |                                             |
| $\Psi(\cdot), p(\text{hab})$      | 365.87     | 0                               | 0.9965                    | 3                     |                                             |
| <b>Jaguarundi</b>                 |            |                                 |                           |                       |                                             |
| $\Psi(\cdot), p(\cdot)$           | 170.78     | 0                               | 0.5548                    | 2                     |                                             |
| $\Psi(\text{hab}), p(\cdot)$      | 171.22     | 0.44                            | 0.4452                    | 3                     | 27.03 (#)                                   |
| <b>Ocelot</b>                     |            |                                 |                           |                       |                                             |
| $\Psi(\cdot), p(\text{hab})$      | 294.61     | 0                               | 0.9998                    | 3                     |                                             |
| <b>Crab-eating raccoon</b>        |            |                                 |                           |                       |                                             |
| $\Psi(\cdot), p(\cdot)$           | 124.6      | 0                               | 0.4516                    | 2                     |                                             |
| $\Psi(\cdot), p(\text{hab})$      | 125.76     | 1.16                            | 0.2529                    | 3                     |                                             |
| <b>White-tailed deer</b>          |            |                                 |                           |                       |                                             |
| $\Psi(\cdot), p(\cdot)$           | 190.76     | 0                               | 0.3984                    | 2                     |                                             |
| $\Psi(\cdot), p(\text{hab})$      | 191.27     | 0.51                            | 0.3087                    | 3                     |                                             |
| $\Psi(\text{hab}), p(\cdot)$      | 192.25     | 1.49                            | 0.1891                    | 3                     | 0.79 (0.95)                                 |
| <b>Capybara</b>                   |            |                                 |                           |                       |                                             |
| $\Psi(\text{hab}), p(\cdot)$      | 166.95     | 0                               | 0.5784                    | 3                     | -1.69 (0.95)                                |
| $\Psi(\text{hab}), p(\text{hab})$ | 168.66     | 1.71                            | 0.246                     | 4                     | -1.61 (0.96)                                |
| <b>Spiny rat</b>                  |            |                                 |                           |                       |                                             |
| $\Psi(\text{hab}), p(\text{hab})$ | 260.92     | 0                               | 0.5125                    | 4                     | -4.20 (1.22)                                |
| $\Psi(\cdot), p(\text{hab})$      | 261.59     | 0.67                            | 0.3666                    | 3                     |                                             |
| <b>Common opossum</b>             |            |                                 |                           |                       |                                             |
| $\Psi(\text{hab}), p(\text{hab})$ | 404.11     | 0                               | 0.969                     | 4                     | -3.62 (1.10)                                |

Notes:  $\Delta AICc$  = difference in AIC values between each model with the lowest AIC model (best model);  $AIC_w$  = Akaike weight.;  $k$  = number of parameters in the model; SE: standard error. Habitat type, a binary covariate with 0 =

forest (intercept) and 1= oil palm (beta). # = high standard error, so species-specific occupancy estimates are imprecise. However, direction of the effect is not affected (Hines et al 2006). Only species with sufficient data to conduct modeling are shown (i.e. at least 4 detections per habitat). Refer to naïve occupancy in Table 1 for rare species and scientific names.
